# Supplementary material for: High flow conditions mediate damaging impacts of sub-lethal thermal stress on corals’ endosymbiotic algae
Source: PubMed Central journal article supplement (PMC8226191; doi:10.1093/conphys/coab046), 2021-06-24
Supplement: supplemental_materials_edit_coab046.pdf [file supplemental_materials_edit_coab046.pdf]

1 **Supplemental Materials**

2

3 **High flow conditions mediate damaging impacts of sub-lethal thermal**

4 **stress on corals' endosymbiotic algae**

5 **Page C E<sup>1,2,3</sup>, Leggat W<sup>3</sup>, Heron S F<sup>4,5</sup>, Fordyce A J<sup>3</sup>, Ainsworth T D<sup>2</sup>**

6

7 <sup>1</sup>Life Sciences, Imperial College, London, SW7 2AZ, United Kingdom

8 <sup>2</sup>School of Biological, Earth and Environmental Sciences (BEES), UNSW, Kensington, NSW,

9 2033, Australia

10 <sup>3</sup>University of Newcastle, School of Environmental and Life Sciences, University Dr,

11 Callaghan, NSW, 2308, Australia

12 <sup>4</sup>Physics and Marine Geophysical Laboratory, College of Science and Engineering, James

13 Cook University, Townsville, 4811, QLD, Australia

14 <sup>5</sup>NOAA Coral Reef Watch, College Park, MD, 20740 USA

15

16

17

18

19

20

21

22

23

24

25

26

27

28

29

30

31

32

33

34

## 35 **S1 Statistical analysis conducted on measured *in situ* flow conditions**

36

37 The stationarity of the time series for each current meter was tested using the package tseries  
38 in R (Trapletti *et al.*, 2011) for the Augmented Dickey-Fuller Test (adf.test). A time series is  
39 stationary if its underlying statistical properties (i.e. mean, variance, autocorrelation) do not  
40 change over time. If a time series did not show stationarity, it was transformed through  
41 differencing to be made stationary (performed by subtracting the previous observation from  
42 the current observation). In addition to summary statistics for each meter, a two sample  
43 Kolmogorov-Smirnov test was used to compare the cumulative distributions of flow speeds  
44 measured at each meter using pairwise comparisons in (Team, 2019). To test whether the flow  
45 speeds measured at each meter are causal (i.e. can be used to forecast each other), patterns of  
46 flow speed were compared between loggers through testing for causality through the Granger  
47 Test using the function grangertest from the R package lmtest (Zeileis *et al.*, 2002). The test is  
48 a Wald test comparing an unrestricted model in which  $y$  is explained by the lags (up to order 1  
49 unit of time) of  $y$  and  $x$  and the restricted model, in which  $y$  is only explained by the lags of  $y$ .  
50 Results will either confirm or reject a null hypothesis that past values of meter  $x$  do not explain  
51 values from meter  $y$ . Pairwise comparisons between each meter were conducted.

52

## 53 **S2 Results of statistical analysis conducted on measured *in situ* flow conditions**

54 Application of the Augmented Dickey-Fuller Test indicate that the time series data for each  
55 meter are stationary. Meters 1 and 2 have higher values in general and show similar patterns in  
56 speed over time (Figure 5a). The distributions of speeds at each meter varies (Figure 5b). Each  
57 logger showed a peak at  $\sim 0.10 \text{ m s}^{-1}$  and logger three shows a bimodal distribution in speed,  
58 with peaks at both  $\sim 0.10 \text{ m s}^{-1}$  and  $0.04 \text{ m s}^{-1}$  (Figure 5b).

59

60 Pairwise comparisons of cumulative distributions for each logger using a two sample  
61 Kolmogorov-Smirnov test indicate that all meters have significantly different distributions  
62 (1:2,  $D = 0.137$ ,  $p < 0.001$ ; 2:3,  $D = 0.274$ ,  $p < 0.001$ ; 1:3,  $D = 0.185$ ,  $p < 0.001$ ) (see  
63 Supplemental Information, Figure S5 for a graph showing the empirical distribution function  
64 for each meter). Pairwise comparisons of meters using the granger test shows that whilst meter  
65 1 is not able to predict meter 2 ( $F_{(34557, -1)} = 0.041$ ,  $p = 0.839$ ), nor meter 3 ( $F_{(34557, -1)} = 2.338$ ,  $p$   
66  $= 0.127$ ), all other meter pairs are predictable of each other (2:1,  $F_{(34557, -1)} = 80.018$ ,  $p = < 0.001$ ;  
67 2:3,  $F_{(34557, -1)} = 7.166$ ,  $p = 0.007$ ; 3:2,  $F_{(34557, -1)} = 56.662$ ,  $p = < 0.001$ ; 3:1,  $F_{(34557, -1)} = 151.52$ ,  $p$   
68  $= < 0.001$ ). Meter 1 and 2 show a northwesterly pattern in direction of flow over the deployment  
69 period, whilst there is no clear pattern in direction of meter 3 (Figure 5c).

70  
71  
72  
73  
74  
75  
76  
77  
78  
79  
80  
81  
82  
83  
84  
85  
86

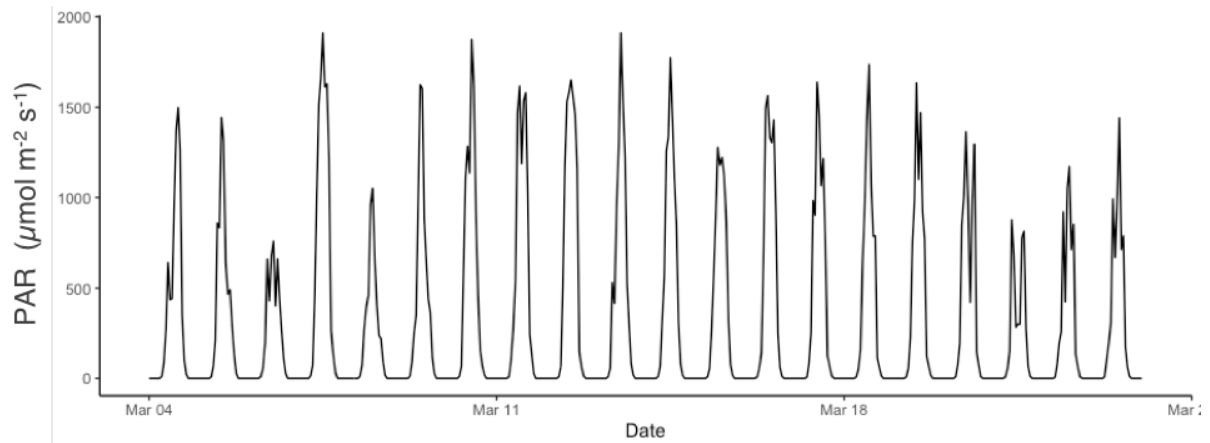

87

88

89 **Figure S1. Average Light intensities during the bleaching level thermal stress**

90 **experimental period.** Light logger intensities measured across the experimental area as

91 photosynthetically active radiation (PAR,  $\mu\text{mol m}^{-2} \text{s}^{-1}$ ). Plot displays the hourly average across

92 all mesocosm tanks in Experiment 2.

93

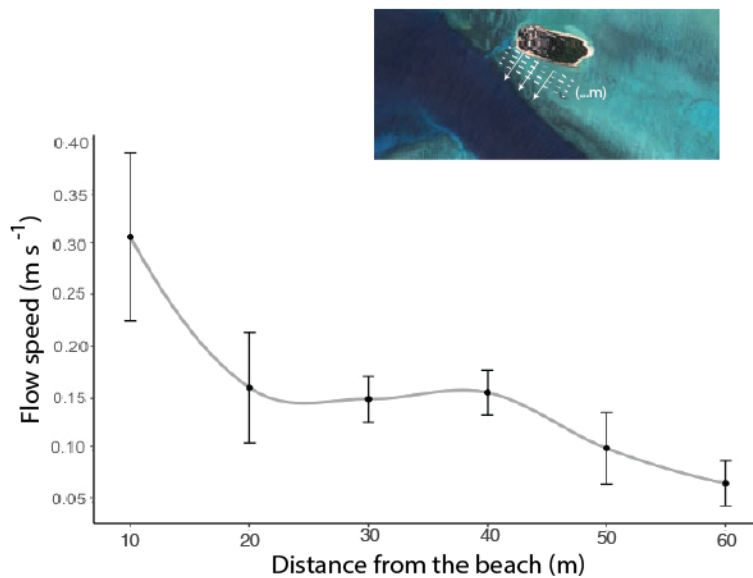

94

95 **Figure S2. Flow conditions on Heron Island reef Flat.** Average flow speeds across all

96 transects at 10 m increments from the beach. Bars represent  $\pm$  standard error.

97

98

99

100

101

102

103

104

105

106

107

108

109

110

111

112

113

114

115

116

117

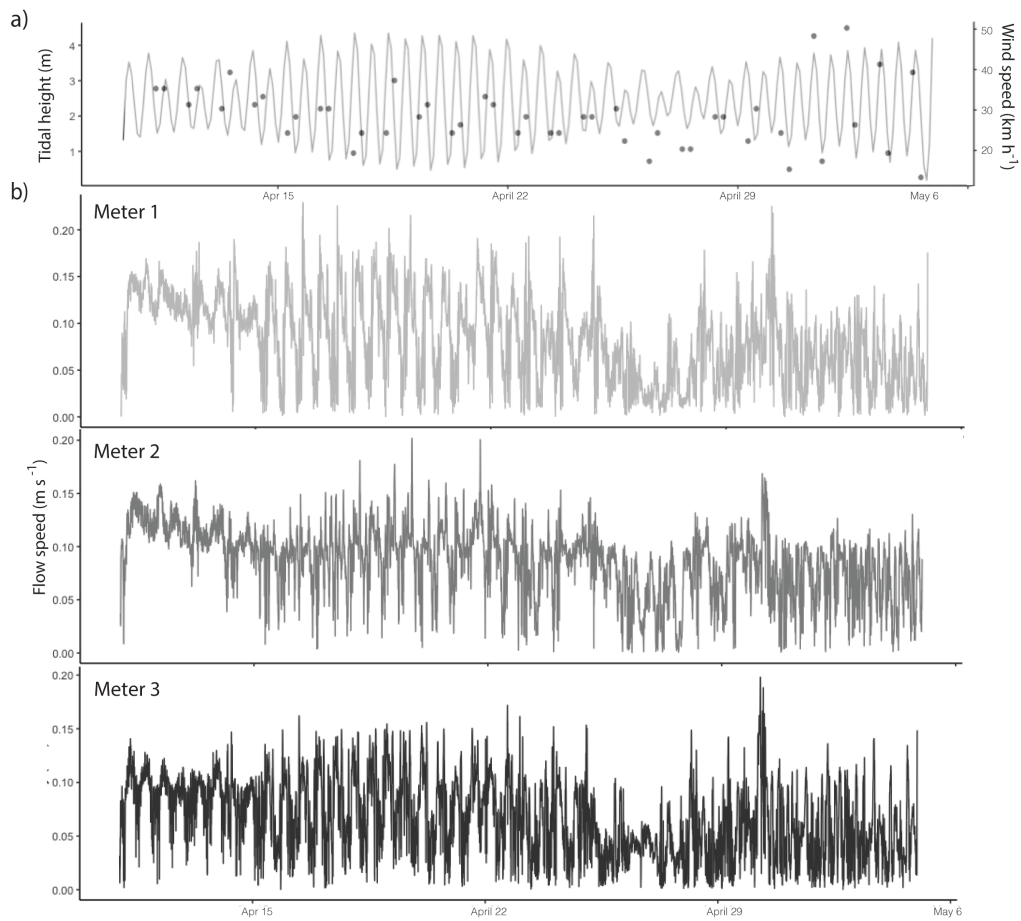

118 **Figure S3. Flow conditions on Heron Island reef slope (Coral Gardens) a)** Graph of tide

119 height (line) and wind speed (dots) at Heron Island (10/04/2019 - 4/05/2019). Data from the

120 Australian Government Bureau of Meteorology. **b)** Time series of water speed every minute

121 (ms<sup>-1</sup>) for meter 1, 2 and 3. **c)** A graph showing the cumulative sum flow speed (ms<sup>-1</sup>) measured

122 at current meter one, two and three coloured light, medium and dark grey respectively.

123

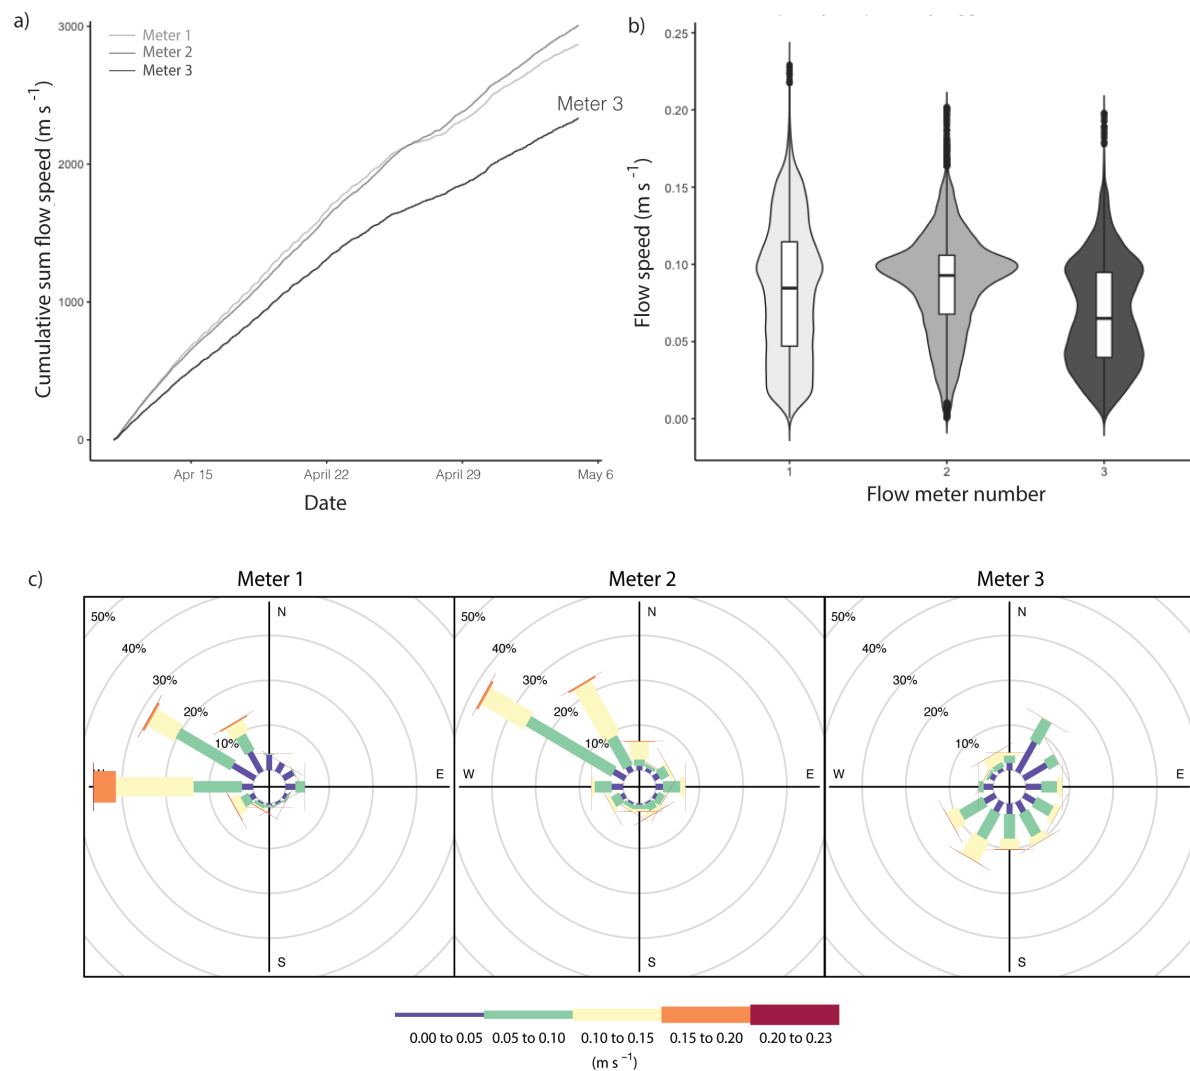

124

125 **Figure S4. Flow conditions on Heron Island reef slope (Coral Gardens)** a) A graph showing  
 126 the cumulative sum flow speed ( $\text{m s}^{-1}$ ) measured at current meters. Meters 1, 2 and 3 are  
 127 coloured light, medium and dark grey respectively. b) Violin box plots for each meter. Boxplot  
 128 shows the median value, interquartile range and upper/lower first and third quartiles. Wider  
 129 sections of represent a higher probability of observation at that speed, and the thinner sections  
 130 correspond to a lower probability. Points represent outliers. Meters 1, 2 and 3 are coloured  
 131 light, medium and dark grey respectively. c) Rose plots for each meter showing the frequency  
 132 (%) of different flow speeds and direction over time. Colour of bar represents speed bin.

133

134  
135  
136  
137  
138  
139  
140  
141  
142  
143  
144  
145

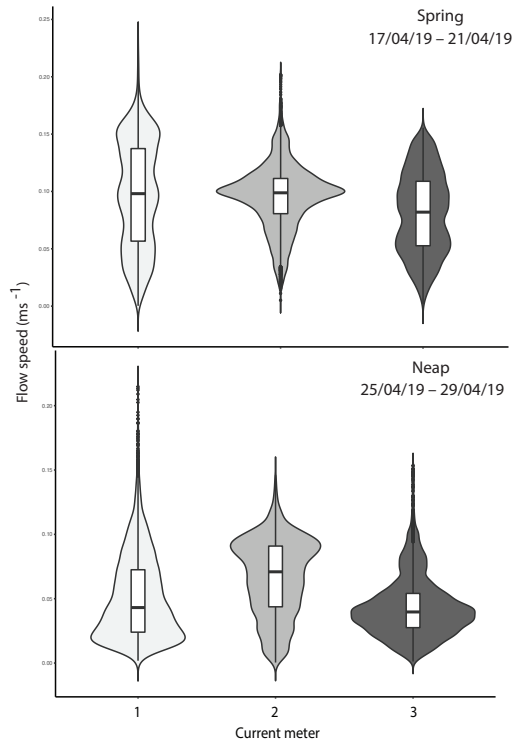

146 **Figure S5.** Violin box plots for each meter during periods defined around spring (17/04/19 –  
147 21/04/19) and neap tides (25/04/19 – 29/04/19). Boxplot shows the median value, interquartile  
148 range and upper/lower first and third quartiles. Wider sections of represent a higher probability  
149 of observation at that speed, and the thinner sections correspond to a lower probability. Points  
150 represent outliers. Meters 1, 2 and 3 are coloured light, medium and dark grey respectively.

151

152

155

156

158

159

160

161 **Figure S6.** Rose plots for each meter showing the frequency (%) of different flow speeds and

162 direction during periods defined around spring (17/04/19 – 21/04/19) and neap tides (25/04/19

163 – 29/04/19). Colour of bar represents speed bin.

164

165

166

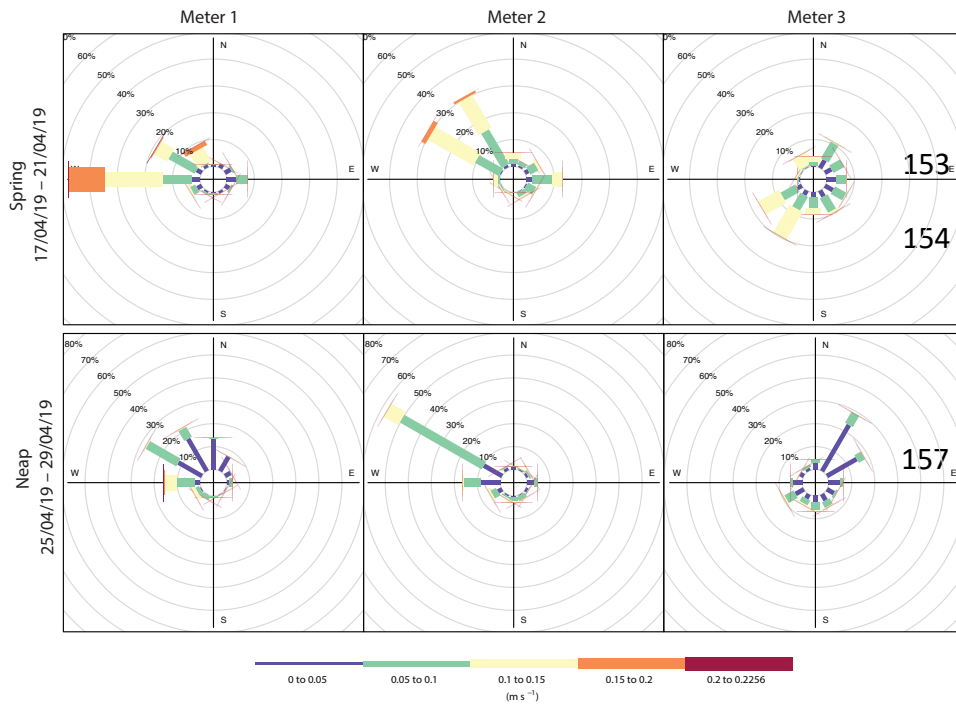



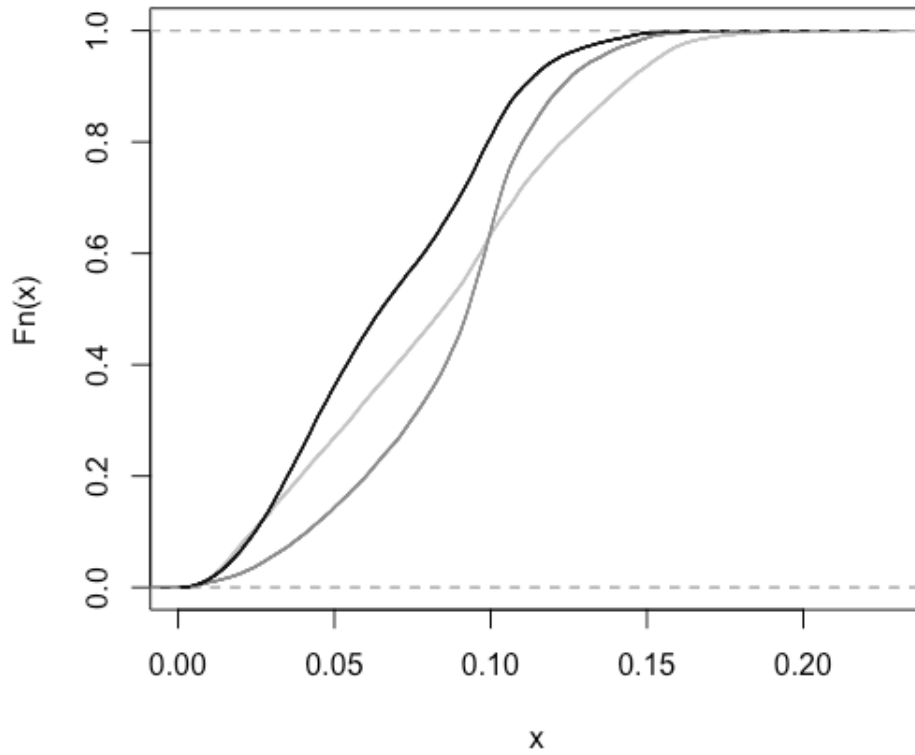

167

168 **Figure S7. Graph showing the empirical distribution function (EDF) for each meter.**

169 Meter one, two and three are colored light, medium and dark grey respectively.

170

171

172

173

174

175

176

177

178

179

180

181

182 **Table S1. Type I analysis of variance with Satterthwaite's Method from a mixed model**  
 183 **analysis to test for the effects of day, temperature trajectory (PS SB, SB and control) and**  
 184 **flow condition (high and low flow) on measured Fv/Fm. p-values < 0.05 are highlighted in**  
 185 **bold. Num df = numerator degrees of freedom, den df = denominator degrees of freedom.**  
 186

---

| Effect                                                                 | Num df | Den df | F-statistic | p-value        |
|------------------------------------------------------------------------|--------|--------|-------------|----------------|
| <b>Experiment 1: Measure of photophysiology, Quantum Yield (Fv/Fm)</b> |        |        |             |                |
| Day                                                                    | 21     | 655    | 13.554      | < <b>0.001</b> |
| Trajectory                                                             | 2      | 655    | 159.605     | < <b>0.001</b> |
| Flow                                                                   | 1      | 655    | 0.084       | 0.772          |
| Day*Trajectory                                                         | 42     | 655    | 4.016       | < <b>0.001</b> |
| Day*Flow                                                               | 21     | 655    | 0.607       | 0.915          |
| Trajectory*Flow                                                        | 2      | 655    | 4.674       | <b>0.010</b>   |
| Day*Trajectory*Flow                                                    | 42     | 655    | 0.802       | 0.811          |

187  
188

189 **Table S2. Type I analysis of variance with Satterthwaite's Method from a mixed model**  
 190 **analysis to test for the effects of time point (Day 15 or Day 24), temperature trajectory**  
 191 **(PS SB, SB and control) and flow condition (high and low flow) on endosymbiont**  
 192 **densities. P-values <0.05 are highlighted in bold. Num df = numerator degrees of freedom, den**  
 193 **df = denominator degrees of freedom.**  
 194

---

| Effect                                      | Num df | Den df     | F-statistic | p-value        |
|---------------------------------------------|--------|------------|-------------|----------------|
| <b>Experiment 1: Endosymbiont densities</b> |        |            |             |                |
| Time point                                  | 1      | 171626778  | 39.922      | < <b>0.001</b> |
| Trajectory                                  | 2      | 124829727  | 21.607      | < <b>0.001</b> |
| Flow                                        | 1      | 144226759  | 0.199       | 0.655          |
| Time point*Trajectory                       | 2      | 104450442  | 6.059       | <b>0.002</b>   |
| Time point*Flow                             | 1      | 120247022  | 1.181       | 0.276          |
| Trajectory*Flow                             | 2      | 86674254.6 | 0.637       | 0.528          |
| Time point*Trajectory*Flow                  | 2      | 76154665.8 | 1.489       | 0.225          |

195

196 **Table S3. Type I analysis of variance with Satterthwaite's method from a mixed model**  
 197 **analysis to test for the effects of day, temperature trajectory (B and control) and flow**  
 198 **condition (high and low flow) on measured Fv/Fm. p-values <0.05 are highlighted in bold.**  
 199 Num df = numerator degrees of freedom, den df = denominator degrees of freedom.

200

---

| Effect                                                                 | Num df | Den df  | F-statistic | p-value        |
|------------------------------------------------------------------------|--------|---------|-------------|----------------|
| <b>Experiment 2: Measure of photophysiology, Quantum Yield (Fv/Fm)</b> |        |         |             |                |
| Day                                                                    | 17     | 424.007 | 52.096      | < <b>0.001</b> |
| Trajectory                                                             | 1      | 424.005 | 687.934     | < <b>0.001</b> |
| Flow                                                                   | 1      | 423.996 | 87.140      | < <b>0.001</b> |
| Day*Trajectory                                                         | 17     | 424.016 | 63.206      | < <b>0.001</b> |
| Day*Flow                                                               | 17     | 423.998 | 8.810       | < <b>0.001</b> |
| Trajectory*Flow                                                        | 1      | 423.998 | 47.577      | < <b>0.001</b> |
| Day*Trajectory*Flow                                                    | 17     | 423.998 | 8.408       | < <b>0.001</b> |

201

202 **Table S4. Type I analysis of variance table with Satterthwaite's Method from a mixed**  
 203 **model analysis to test for the effects of day, temperature trajectory (B and control) and**  
 204 **flow condition (high and low flow) on measured Fv/Fm after light stress and recovery of**  
 205 **PSII (induction recovery). p-values <0.05 are highlighted in bold. Num df = numerator**  
 206 **degrees of freedom, den df = denominator degrees of freedom.**

207

---

| Effect                                                                          | Num df | Den df | F-statistic | p-value        |
|---------------------------------------------------------------------------------|--------|--------|-------------|----------------|
| <b>Experiment 2: Measure of photophysiology, Quantum Yield (Fv/Fm) IR curve</b> |        |        |             |                |
| Trajectory                                                                      | 1      | 706.45 | 315.868     | < <b>0.001</b> |
| Flow                                                                            | 1      | 717.93 | 19.015      | < <b>0.001</b> |
| Day                                                                             | 7      | 717.93 | 10.268      | < <b>0.001</b> |
| Trajectory*Flow                                                                 | 1      | 717.93 | 5.642       | <b>0.019</b>   |
| Trajectory*Day                                                                  | 7      | 717.93 | 18.926      | < <b>0.001</b> |
| Flow*Day                                                                        | 7      | 717.93 | 0.694       | 0.676          |
| Day*Trajectory*Flow                                                             | 7      | 717.93 | 1.028       | 0.410          |

208

209

210 **Table S5. Type I analysis of variance with Satterthwaite's Method from a mixed model**  
 211 **analysis to test for the effects of time point (Day 1 or Day 20), temperature trajectory (B**  
 212 **and control) and flow condition (high and low flow) on endosymbiont densities.** P-values  
 213 < 0.05 are highlighted in bold. Num df = numerator degrees of freedom, den df = denominator  
 214 degrees of freedom.  
 215

| <b>Effect</b>                               | <b>Num df</b> | <b>Den df</b> | <b>F-statistic</b> | <b>p-value</b> |
|---------------------------------------------|---------------|---------------|--------------------|----------------|
| <b>Experiment 2: Endosymbiont densities</b> |               |               |                    |                |
| Time point                                  | 1             | 3.35E+40      | 16.891             | < <b>0.001</b> |
| Trajectory                                  | 1             | 3.35E+40      | 126.936            | < <b>0.001</b> |
| Flow                                        | 1             | 3.35E+40      | 0.2829             | 0.595          |
| Time point*Trajectory                       | 1             | 3.35E+40      | 81.386             | < <b>0.001</b> |
| Time point*Flow                             | 1             | 3.35E+40      | 0.598              | 0.439          |
| Trajectory*Flow                             | 1             | 3.35E+40      | 4.246              | <b>0.039</b>   |
| Time point*Trajectory*Flow                  | 1             | 3.35E+40      | 0.155              | 0.694          |

216  
 217  
 218 **Table S6. Variance and standard deviation of random effects and residuals of mixed**  
 219 **effects models conducted on response variables from Experiment 1 and Experiment 2.**  
 220

| <b>Response variable</b> | <b>Random effect</b> | <b>Variance</b> | <b>Standard deviation</b> |
|--------------------------|----------------------|-----------------|---------------------------|
| <b>Experiment 1</b>      |                      |                 |                           |
| Quantum Yield            | Coral ID : Tank      | 0.0000412       | 0.006419                  |
|                          | Tank                 | 0.0001233       | 0.011105                  |
|                          | Residual             | 0.0012834       | 0.035825                  |
| Endosymbiont density     | Tank                 | 6.12E+09        | 78200                     |
|                          | Residual             | 2.42E+11        | 491713                    |
| <b>Experiment 2</b>      |                      |                 |                           |
| Quantum Yield            | Tank                 | 0.0001414       | 0.01189                   |
|                          | Residual             | 0.0013026       | 0.03609                   |
| Quantum Yield: IR curve  | Tank                 | 9.77E-05        | 0.009882                  |
|                          | Residual             | 1.84E-02        | 0.135722                  |
| Endosymbiont density     | Tank                 | 0               | 0                         |
|                          | Residual             | 2.01E+11        | 448176                    |

221
